# Supplementary material for: Leptin Signaling Contributes to Aromatase Inhibitor Resistant Breast Cancer Cell Growth and Activation of Macrophages
Source: PubMed Central journal article supplement (PMC7226081; doi:10.3390/biom10040543), 2020-04-03
Supplement: biomolecules-10-00543-s001.pdf [file biomolecules-10-00543-s001.pdf]

**Table S1. Oligonucleotide primers used in this study.**

| <i>Gene Name</i>                         | <i>Gene Symbol</i> | <i>Species</i> |         | <i>Primer Sequences</i>               |
|------------------------------------------|--------------------|----------------|---------|---------------------------------------|
| Leptin Receptor Long Isoform             | <i>ObRl</i>        | <i>Human</i>   | Forward | 5'-GATAGAGGCCAGGCATTTTTTA-3'          |
|                                          |                    |                | Reverse | 5'-CACCCTCTCTCTCTTTTTGATTGA-3'        |
| Leptin Receptor Short Isoform            | <i>ObRsh</i>       | <i>Human</i>   | Forward | 5'-ATTGTGCCAGTAATTATTTCTCTTCC-3'      |
|                                          |                    |                | Reverse | 5'-CCACCATATGTTAACTCTCAGAAGTTCAA-3'   |
| Leptin                                   | <i>Ob</i>          | <i>Human</i>   | Forward | 5'-GAGACCTCCTCCATGTGCTG -3'           |
|                                          |                    |                | Reverse | 5'-TGAGCTCAGATATCGGGCTGAAC -3'        |
| 18s rRNA                                 | <i>18s</i>         | <i>Human</i>   | Forward | 5'-CCCCTCCTCCACCTTTGAC-3'             |
|                                          |                    |                | Reverse | 5'-TGTGCTGTAGCCAAATTCGTT-3'           |
| Arginase-1                               | <i>ARG1</i>        | <i>Mouse</i>   | Forward | 5'-CTCCAAGCCAAAGTCCTTAGAG-3'          |
|                                          |                    |                | Reverse | 5'-AGGAGCTGTCATTAGGGACATC-3'          |
| Interleukin-10                           | <i>IL10</i>        | <i>Mouse</i>   | Forward | 5'-CTGGACAACATACTGCTAACCG-3'          |
|                                          |                    |                | Reverse | 5'-GGCATCACTTCTACCAGGTAA-3'           |
| Nitric Oxide Synthase                    | <i>INOS</i>        | <i>Mouse</i>   | Forward | 5'-GTTCTCAGCCCAACAATACAAGA-3'         |
|                                          |                    |                | Reverse | 5'-GTGGACGGGTCGATGTCAC -3'            |
| Interleukin-12                           | <i>IL12</i>        | <i>Mouse</i>   | Forward | 5'-TGGTTTGCCATCGTTTTGCTG-3'           |
|                                          |                    |                | Reverse | 5'-CAGGTGAGGTTCACTGTTTCT-3'           |
| Chemokine (C-X-C motif) receptor 4       | <i>CXCR4</i>       | <i>Mouse</i>   | Forward | 5'-GAAGTGGGGTCTGGAGACTAT -3'          |
|                                          |                    |                | Reverse | 5'-TTGCCGACTATGCCAGTCAAG-3'           |
| Transforming growth factor beta          | <i>TGF-β</i>       | <i>Mouse</i>   | Forward | 5'-ATCCTGTCCAAACTAAGGCTCG-3'          |
|                                          |                    |                | Reverse | 5'-ACCTCTTAGCATAGTAGTCCGC-3'          |
| SMAD family member 3                     | <i>SMAD3</i>       | <i>Mouse</i>   | Forward | 5'-GGATCCATGTCGTCCATCCTGCC-3'         |
|                                          |                    |                | Reverse | 5'-GAATTCCTAAGACACACTGGAACAGCGGATG-3' |
| Glyceraldehyde 3-phosphate dehydrogenase | <i>GAPDH</i>       | <i>Mouse</i>   | Forward | 5'-CCCCTCCTCCACCTTTGAC-3'             |
|                                          |                    |                | Reverse | 5'-TGTGCTGTAGCCAAATTCGTT-3'           |
